# Effect of the COVID-19 pandemic in stroke code activations in the region of Madrid: a retrospective study

Nicolás Riera-López, MD (1), Blanca Fuentes-Gimeno, MD, PhD (2), Jorge Rodríguez-Pardo de Donlebun, MD (2)

1. Stroke Code coordinator. Madrid Emergency Medical Service (SUMMA 112). Spain
2. Department of Neurology and Stroke Center. La Paz University Hospital. Universidad Autónoma de Madrid. IdiPAZ Research Institute. Spain

## Correspondence author:

Nicolás Riera-López. Stroke Code coordinator. Madrid Emergency Medical Service. Antracita, 2bis. 28045 Madrid. Spain. Email: [nicolas.riera@salud.madrid.org](mailto:nicolas.riera@salud.madrid.org) ORCID: <https://orcid.org/0000-0002-0862-434X>

## ORCID:

Nicolás Riera López: 0000-0002-0862-434X

Blanca Fuentes-Gimeno: 0000-0002-0363-862X

Jorge Rodríguez-Pardo de Donlebún: 0000-0002-8926-1287

**Word count:** 921 (text without title page, abstract, references, figures and tables), 164 (abstract)

**Tables:** 1

**Figures:** 2

**Key words:** stroke, EMS, stroke code, COVID-19.

## **ABSTRACT**

Acute Stroke (AS) is the most common time-dependent disease attended in the Emergency Medicine Service (EMS) of Madrid (SUMMA 112). Community of Madrid has been one of the most affected regions in Spain by the coronavirus disease 2019 (COVID19) pandemic. A significant reduction in AS hospital admissions has been reported during the COVID-19 pandemic compared to the same period one year before. We aimed to examine the impact of the COVID-19 in stroke codes (SC) in our EMS among three periods of time: the COVID-19 period, the same period the year before, and the 2019-2020 seasonal influenza period. Results: We found no significant reduction in SC during the COVID-19 pandemic. The reduction of hospital admissions might be attributable to patients attending to the hospital by their own means. The maximum SC workload seen during the seasonal influenza has not been reached during the pandemic. We detected a non-significant deviation from the SC protocol, with a slight increase in hospitals' transfers to non-stroke ready hospitals.

## INTRODUCTION

Acute Stroke (AS) is the most common time-dependent pathology attended in the Emergency Medicine Service (EMS) of Madrid (SUMMA 112). It is the first cause of mortality among women and the first cause of disability in adults.

Community of Madrid has been one of the most affected in Spain by the coronavirus disease 2019 (COVID19) pandemic. Until May 31st, 68.830 cases and 8.691 fatalities have been registered, nearly one-third of the whole country's total count.

A reduction in AS admissions has been reported during the COVID-19 pandemic [1-5]. We aimed to study the frequency of SC compared with the previous year, and with a period with similar characteristics from EMS perspective, like seasonal influenza (health system overload, similar severity risk factors).

## METHODS

We conducted a retrospective observational study using the prospective SC registry of SUMMA 112 (ethics approved). We selected all consecutive patients within three periods of time:

1. March 1st to May 8th, 2020, for the COVID-19 period (incidence above the median of the series),
2. March 1st to May 8th, 2019, for the PreCOVID-19 period (the same period the year before),
3. November 24th, 2019 to February 14th, 2020, for the seasonal influenza period (incidence above the median of the series).

SUMMA 112 is the leading Emergency Medical Service (EMS) in Madrid. For any call, a medical team assesses the situation. If an AS is suspected, a severity scale is evaluated to detect the possibility of large vessel occlusion (the Madrid DIRECT scale) [6]. Depending on the result, the appropriate destination is selected (comprehensive stroke center or primary stroke center), and the main findings are communicated to the Emergency Coordination Center (ECC) and registered on an electronic database. The ECC then pre alerts the neurologist on call at the destination facility. An SC is defined as a patient with sudden neurological symptoms in the last 24 hours or less, previously independent for basic activities of daily living [7].

The new coronavirus (SARS-CoV2) infection rate has been collected from the Health Ministry of Spain, and the number of seasonal influenza cases from the influenza sentinel system (Institute of Health Carlos III).

The three groups' means have been compared using the ANOVA test with the Tukey-Kramer method for pairwise comparisons. The rest of the variables have been compared, applying ANOVA or Kruskal-Wallis tests. The Chi-square test has been used

to compare categorical variables. The difference of means has been estimated with a 95% confidence interval, considering statistically significant those with  $p < 0,05$ .

We used Rstudio for statistical analyses and Microsoft Excel for the graphs.

## RESULTS

SUMMA 112 attends an average of 150 SC (95% CI: 133-167) per month (figure 1). We attended a total of 1,130 SC during the three periods.

A significant younger age of the COVID-19 group (95% CI: 67.6-71) compared with the other two groups (pre-COVID-19, 95%CI: 71.2-74; influenza, 95% CI: 71.8-74.3) was found. Also, a lower proportion of women were attended with suspected stroke (COVID-19: 43.9%, 95% CI: 38.2%-49.7%; pre-COVID-19 51.9%, 95% CI: 46.4% - 57.2%; influenza 53.3%, 95% CI: 48.8%-57.8%) (table 1).

During the period of COVID-19, a non-significant daily reduction of 13% SC was observed compared with the pre-COVID-19 period (difference of -0.68 daily cases, 95% CI: 0.15 to -1.51) and a statistically significant reduction of 24% compared with the seasonal influenza period (-1.41, 95% CI: -0.62 to -2.21) (figure 2).

Finally, there was also a non-significant reduction in transfers rates to stroke centers (87% vs. 90%,  $p=0.61$ ) at the cost of increasing transfers to hospitals not suitable for SC (5% vs. 3%,  $p=0.17$ ), which suggests poor adherence to the protocol.

## DISCUSSION

We did not detect a significant decrease in SC cases during the COVID-19 period (figure 2). Stroke admissions in hospitals are a sum of those transferred by the EMS and those diagnosed in the Emergency Room among those arriving by their own means. The main reason for the reported reduction of stroke admissions might be at the latter group. It is congruent with the reported reduction in transient ischemic attack and mild strokes [8]. Patients with mild or temporary symptoms may have been more concerned about being infected in the hospital or having delayed their evaluation. Efforts should be made in awareness campaigns, in the message to call 112 whenever the patient identifies a sign of stroke.

Despite the evidence of thrombotic events associated with SARS-COV-2 infection [9], no increase in SC has been observed. It could be due to the EMS's saturation, which has not been able to attend some AS cases. A possible explanation is that saturation of the information and emergency hotlines (112) might have blocked potential patients with stroke symptoms from being attended [1].

Stroke patients were younger in the COVID-19 period. It is possible that older people refrained from attending the emergency department and strictly followed the messages of staying at home [1-2].

We want to highlight the stability of the SC protocol that has succeeded under those extraordinary circumstances, although we detected a non-significant deviation from the SC protocol, with a slight increase in transfers to non-stroke ready hospitals.

The main limitation of this study is that it is focused on calls to 112, and the information on other AS patients is lacking.

We did not find evidence of a significant reduction of SC during the COVID-19 pandemic compared with the same period of the year before. The number of SC was significantly lower during the COVID-19 period than the 2019-2020 seasonal influenza period, thus SC seems to be capable of operating correctly, even with a high level of health system saturation.

Table 1

|                                          | <b>PRECOVID 19 PERIOD</b> | <b>COVID 19 PERIOD</b> | <b>SEASONAL INFLUENZA 19-20</b> | <b>P VALUE</b> |
|------------------------------------------|---------------------------|------------------------|---------------------------------|----------------|
| <b>STROKE CODES</b>                      |                           |                        |                                 |                |
| <b>N</b>                                 | 345                       | 303                    | 482                             |                |
| <b>SC PER DAY, MEAN (SD)</b>             | 5.07 (2.03)               | 4.39 (1.88)            | 5.8 (2.22)                      | <0.01          |
| <b>AGE, MEAN (SD)</b>                    | 72.5 (13.5)               | 69.2 (15.1)            | 73 (14)                         | <0.01          |
| <b>MALE SEX, N (%)</b>                   | 166 (48.1%)               | 170 (56.1%)            | 225 (46.7%)                     | 0.029          |
| <b>DESTINATION HOSPITAL</b>              |                           |                        |                                 |                |
| <b>REFERRAL TO A CSC, N (%)</b>          | 311 (90.1%)               | 266 (87.8%)            | 430 (89.2%)                     | 0.61           |
| <b>REFERRAL TO A PSC, N (%)</b>          | 22 (6.4%)                 | 21 (6.9%)              | 39 (8.1%)                       | 0.655          |
| <b>REFERRAL TO OTHER HOSPITAL, N (%)</b> | 12 (3.5%)                 | 16 (5.3%)              | 13 (2.7%)                       | 0.167          |

## Acknowledgements

The authors thank the SUMMA-112 Coordination Center and the Community of Madrid Health Service (Servicio Madrileño de Salud) for making this possible. Special thanks to Isabel del Cura (Unidad de investigación Gerencia Atención Primaria Madrid - Fundación para la Investigación y la Innovación Biosanitaria en Atención Primaria de la Comunidad de Madrid, FIIBAP), for the manuscript review; Nuria Rodríguez Rodill (IT department of the Emergency Medical Service, SUMMA 112) for the data acquisition, and Balvinder Singh Powar for the manuscript translation.

## Competing Interests

The authors report no disclosures relevant to the manuscript.

## Funding

The authors received no financial support for the research, authorship, and/or publication of this article.

## References

- 1 Rudilosso S, Laredo C, Vera V, *et al.*. Acute Stroke Care Is at Risk in the Era of COVID-19: Experience at a Comprehensive Stroke Center in Barcelona.. *Stroke* 2020;**51**:1991–5.
- 2 Montaner J, Barragán-Prieto A, Pérez-Sánchez S, *et al.*. Break in the Stroke Chain of Survival due to COVID-19.. *Stroke* 2020;**51**:2307–14.
- 3 Tejada MH, Lambea GÁ, Sancho SA, *et al.*. Impact of COVID-19 outbreak in reperfusion therapies of acute ischemic stroke in North-West Spain.. *Eur J Neurol* 2020.
- 4 Kansagra AP, Goyal MS, Hamilton S, *et al.*. Collateral Effect of Covid-19 on Stroke Evaluation in the United States.. *N Engl J Med* 2020;**383**:400–1.
- 5 Aguiar de SD, Sandset EC, Elkind MSV. The Curious Case of the Missing Strokes During the COVID-19 Pandemic.. *Stroke* 2020;**51**:1921–3.
- 6 Rodríguez-Pardo J, Riera-López N, Fuentes B, Alonso de Leciñana M, Secades-García S, Álvarez-Fraga J, *et al.* Prehospital selection of thrombectomy candidates beyond large vessel occlusion: M-DIRECT scale. *Neurology*. 25 de febrero de 2020;94(8):e851-60.
- 7 Alonso de LM, Fuentes B, Ximénez-Carrillo Á, *et al.*. A collaborative system for endovascular treatment of acute ischaemic stroke: the Madrid Stroke Network experience.. *Eur J Neurol* 2016;**23**:297–303.
- 8 Teo KC, Leung WCY, Wong YK, *et al.*. Delays in Stroke Onset to Hospital Arrival Time During COVID-19.. *Stroke* 2020;**51**:2228–31.
- 9 Klok FA, Kruip MJHA, van der MNJM, *et al.*. Incidence of thrombotic complications in critically ill ICU patients with COVID-19.. *Thromb Res* 2020;**191**:145–7.

## List of Figures

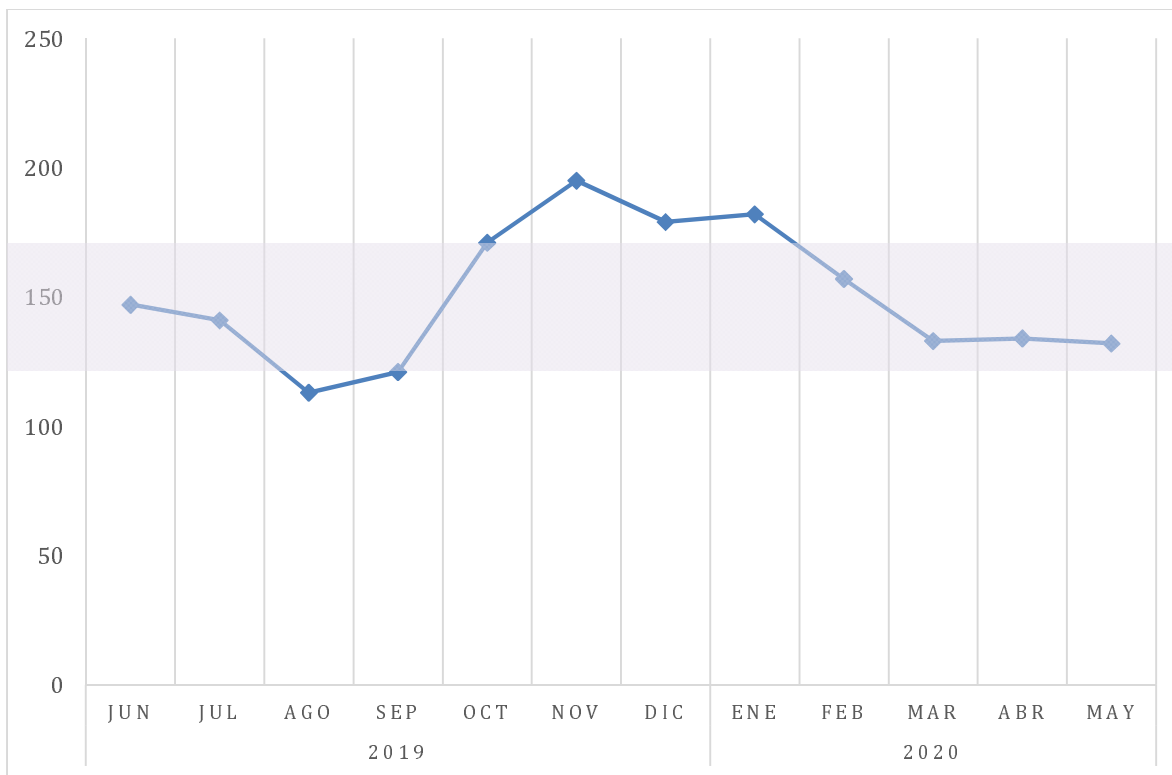

Figure 1: Monthly frequency of Stroke Codes in SUMMA 112 (shaded area 95% CI).



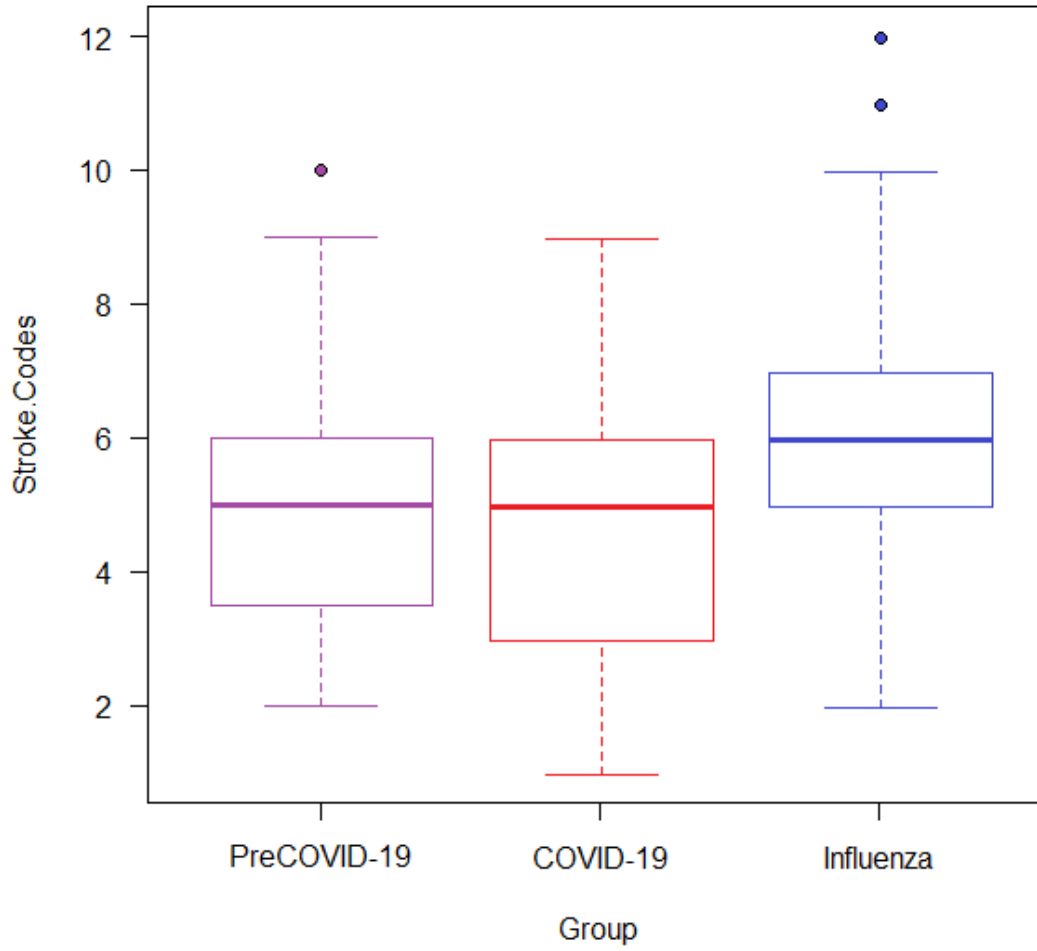

Figure 2: Box plot of the daily incidence of stroke codes in each of the periods.
